# Supplementary material for: Experimental and theoretical studies on polar Diels–Alder reactions of 1-nitronaphathalene developed in ionic liquids
Source: Royal Society of Chemistry journal article supplement (doi:10.1039/c3ra42042f), 2013-01-01
Supplement: c3ra42042f.pdf [file c3ra42042f.pdf]

## SUPPLEMENTARY INFORMATION

### Experimental and Theoretical Studies on Polar Diels-Alder Reactions of 1-Nitronaphthalene developed in Ionic Liquids.

Pedro M.E. Mancini, Claudia D. Della Rosa, Carla M. Ormachea, María N. Kneeteman,  
and Luis R. Domingo

#### Contents

- S2**  $^1\text{H}$  NMR of the compound **7**
- S3**  $^{13}\text{C}$  NMR of the compound **7**
- S4** ir spectra of the compound **7**
- S5**  $^1\text{H}$  NMR of the compound **8**
- S6**  $^{13}\text{C}$  NMR of the compound **8**
- S7** COSY  $^1\text{H}$ - $^1\text{H}$  of the compound **8**
- S8** ir spectra of the compound **8**
- S9**  $^1\text{H}$  NMR of the compound **9**
- S10**  $^{13}\text{C}$  NMR of the compound **9**
- S11** COSY  $^1\text{H}$ - $^1\text{H}$  of the compound **9**
- S12** ir spectra of the compound **9**
- S13** **Table S1.** Total (E, in au) and relative ( $\Delta E$ , in kcal/mol) energies, in gas phase and in benzene, of the stationary points involved in the reaction between 1-nitronaphthalene **1** and 1-trimethylsilyloxy-1,3-butadiene **3**.  
**Table S2.** Total (E, in au) and relative ( $\Delta E$ , in kcal/mol) energies, in gas phase and in 1-heptanol, of the stationary points involved in the reaction between complex **1-PIL** and 1-trimethylsilyloxy-1,3-butadiene **3**.
- S14** **Table S3.** MPWB1K/6-311G\*\* Total enthalpies (H, in au), entropies (S, in eu) and free energies (G, in au) in 1-heptanol, computed at 60 °C and 1 atm, of the stationary points involved in reaction *Model II*.
- S15** Complete citation for reference 34.
- S16** MPWB1K/6-31G\* computed total energies, unique frequency imaginary, and cartesian coordinates of the stationary points involved in the reaction between 1-nitronaphthalene **1** and 1-trimethylsilyloxy-1,3-butadiene **3**, and in the reaction between complex **1-PIL** and 1-trimethylsilyloxy-1,3-butadiene **3**.

## Compound 7

Captions  $^1\text{H}$  NMR spectra

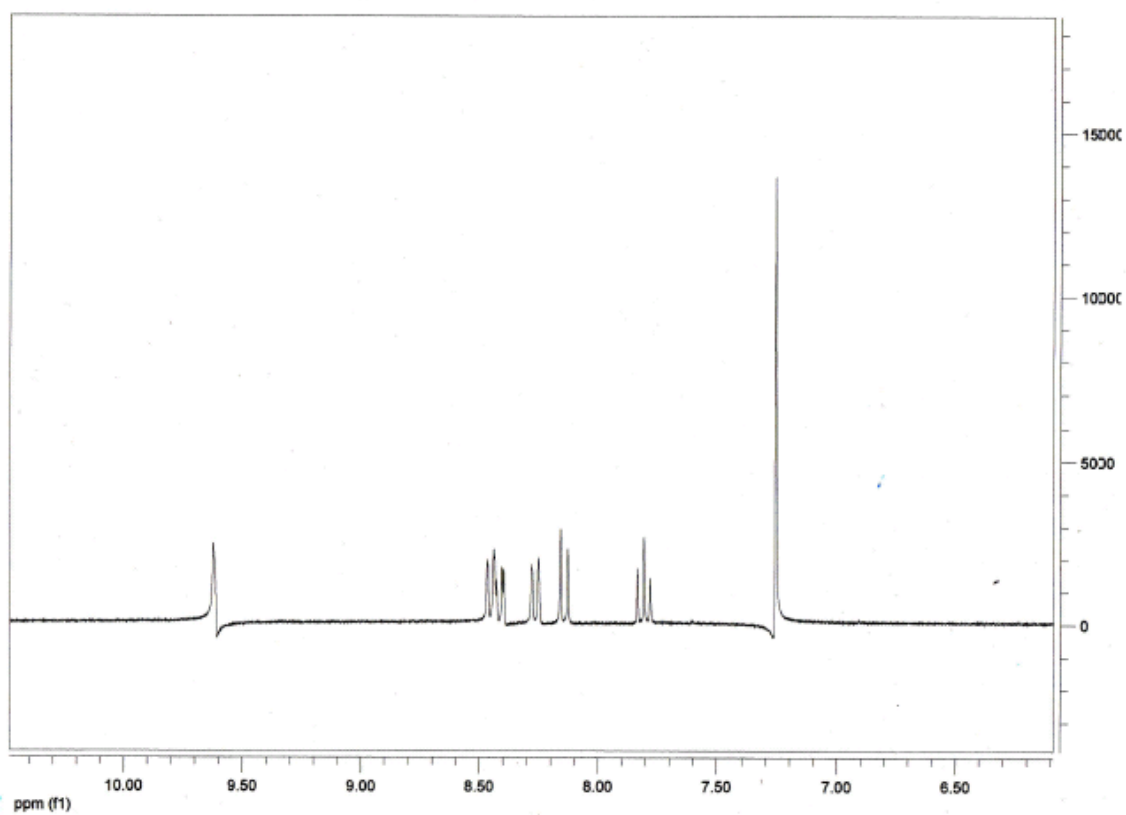

### Captions $^{13}\text{C}$ NMR spectra

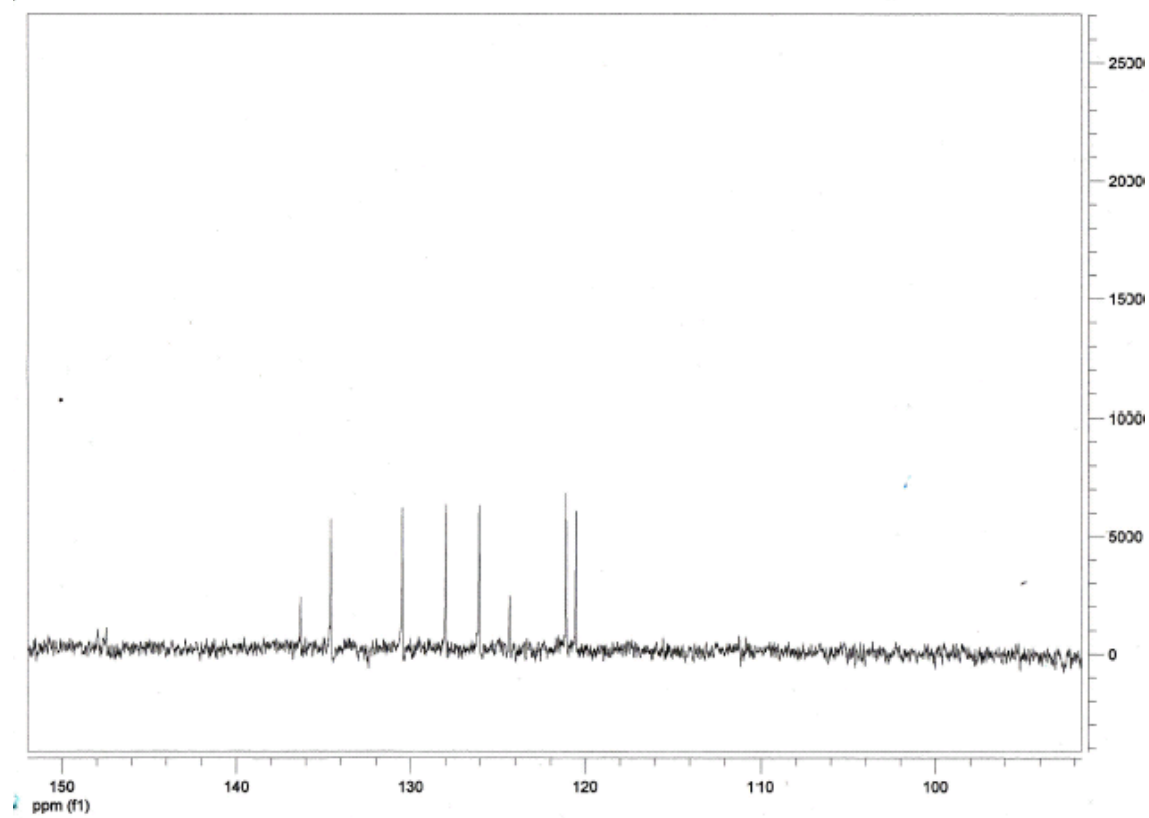

Captions **IR spectra**

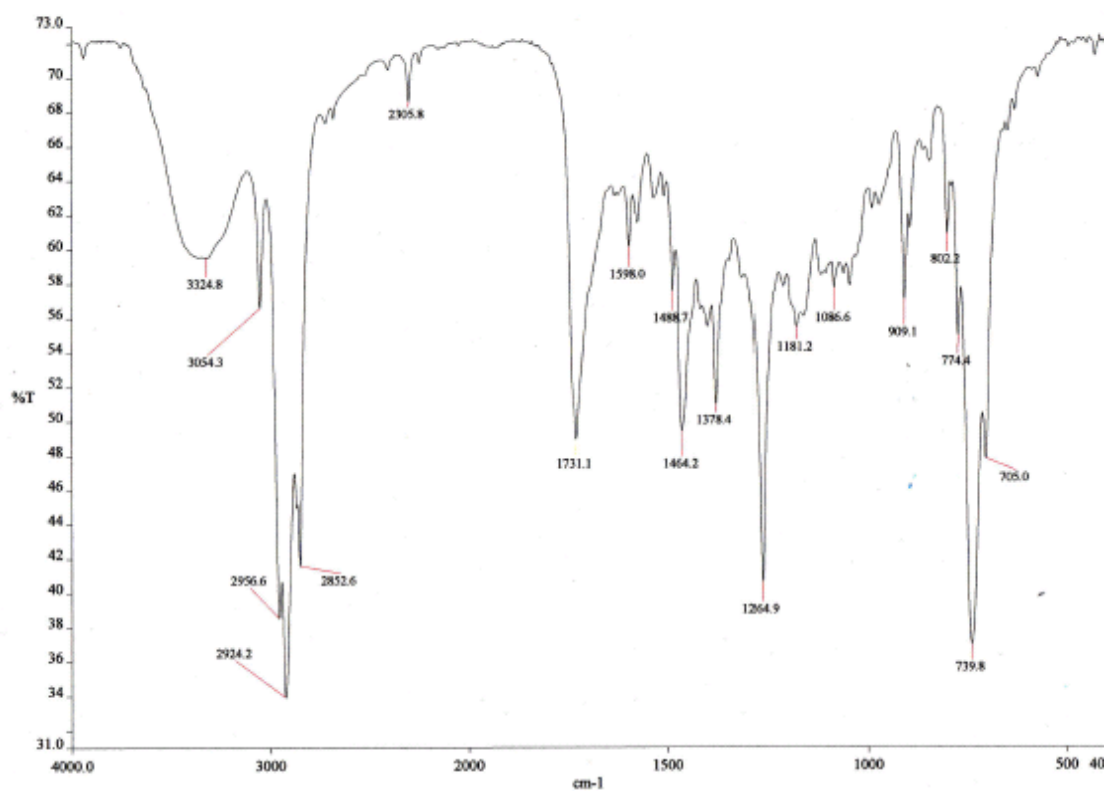

## Compound 8

Captions:  $^1\text{H}$  NMR spectra

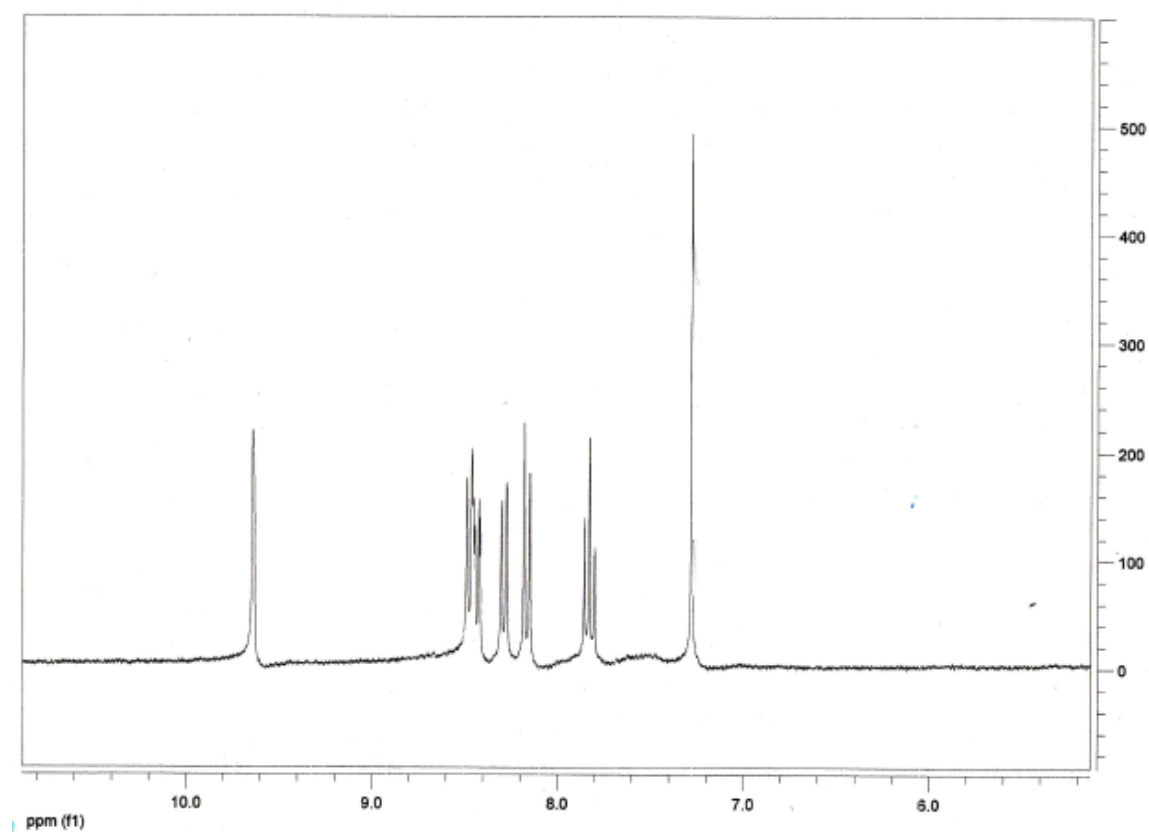

Captions:  $^{13}\text{C}$  NMR spectra

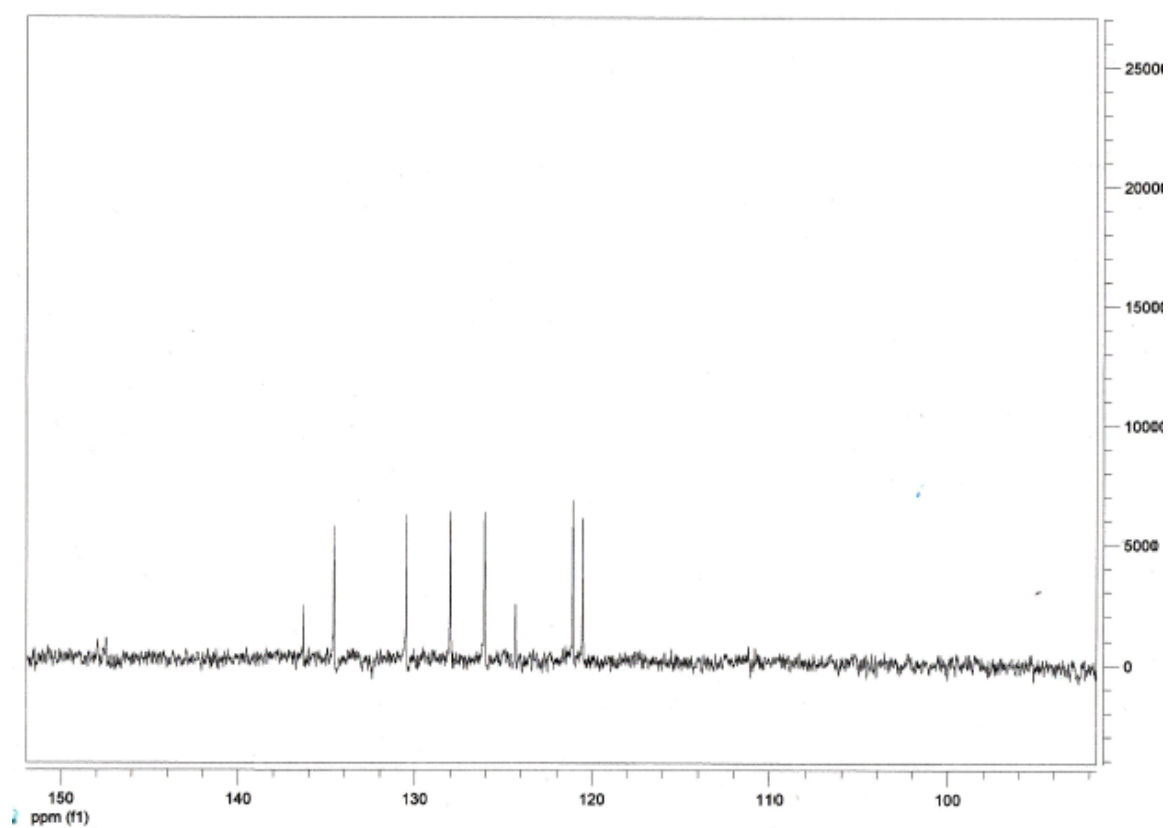

Captions: COSY  $^1\text{H}$ - $^1\text{H}$  (Connectivity  $^1\text{H}$ - $^1\text{H}$ )

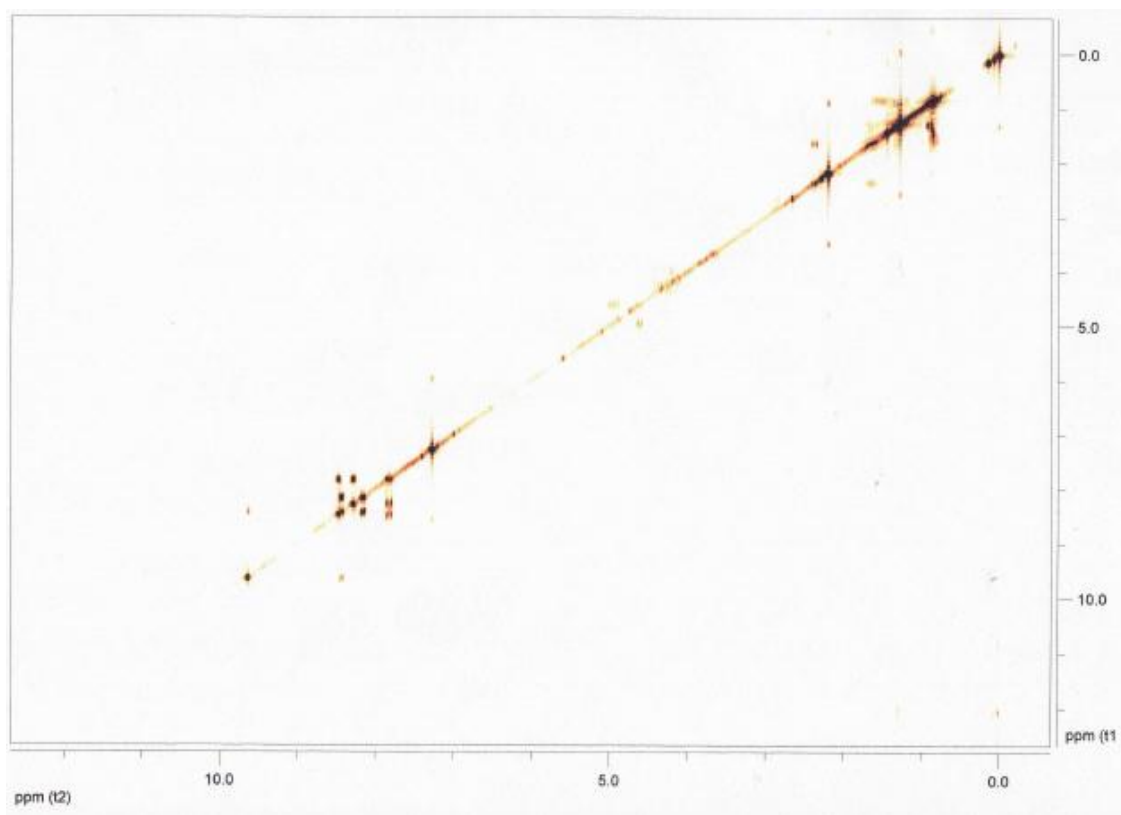

Captions: **IR spectra**

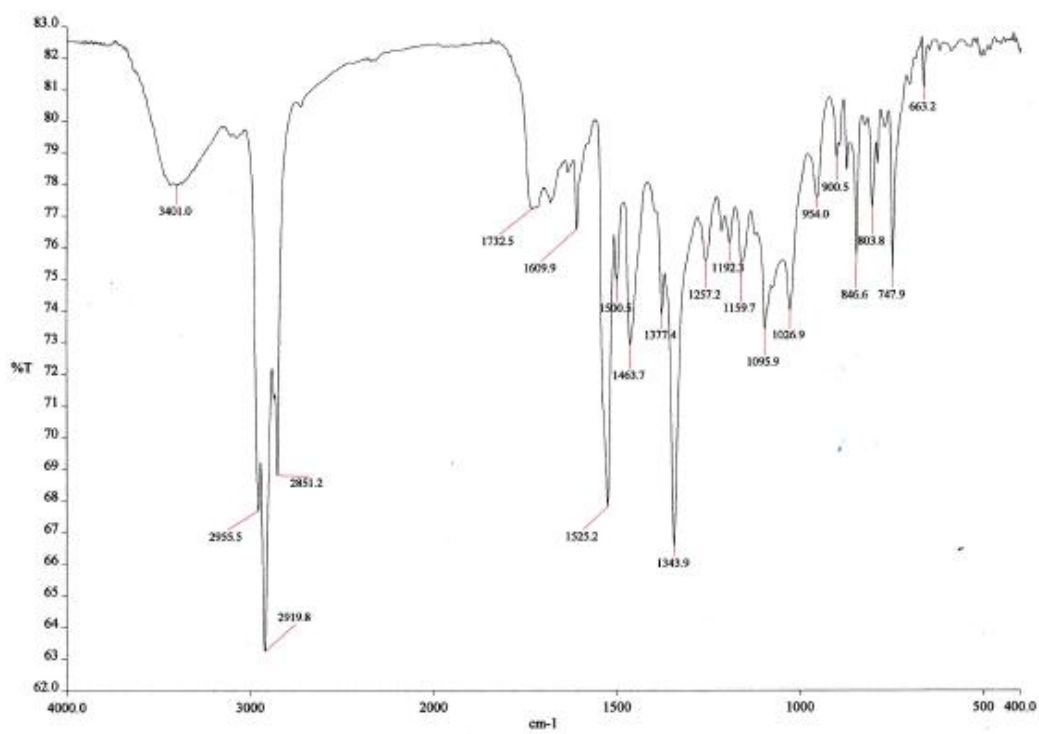



## Compound 9

Captions:  $^1\text{H}$  NMR

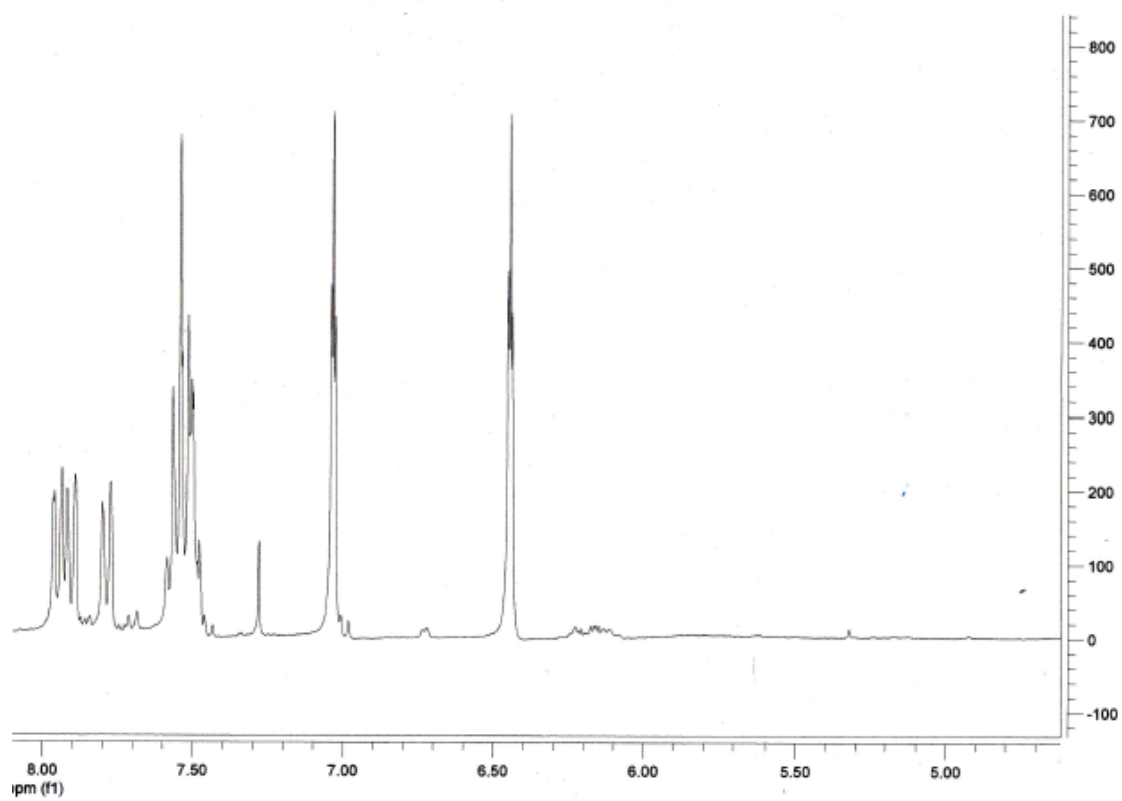

Captions:  $^{13}\text{C}$  NMR

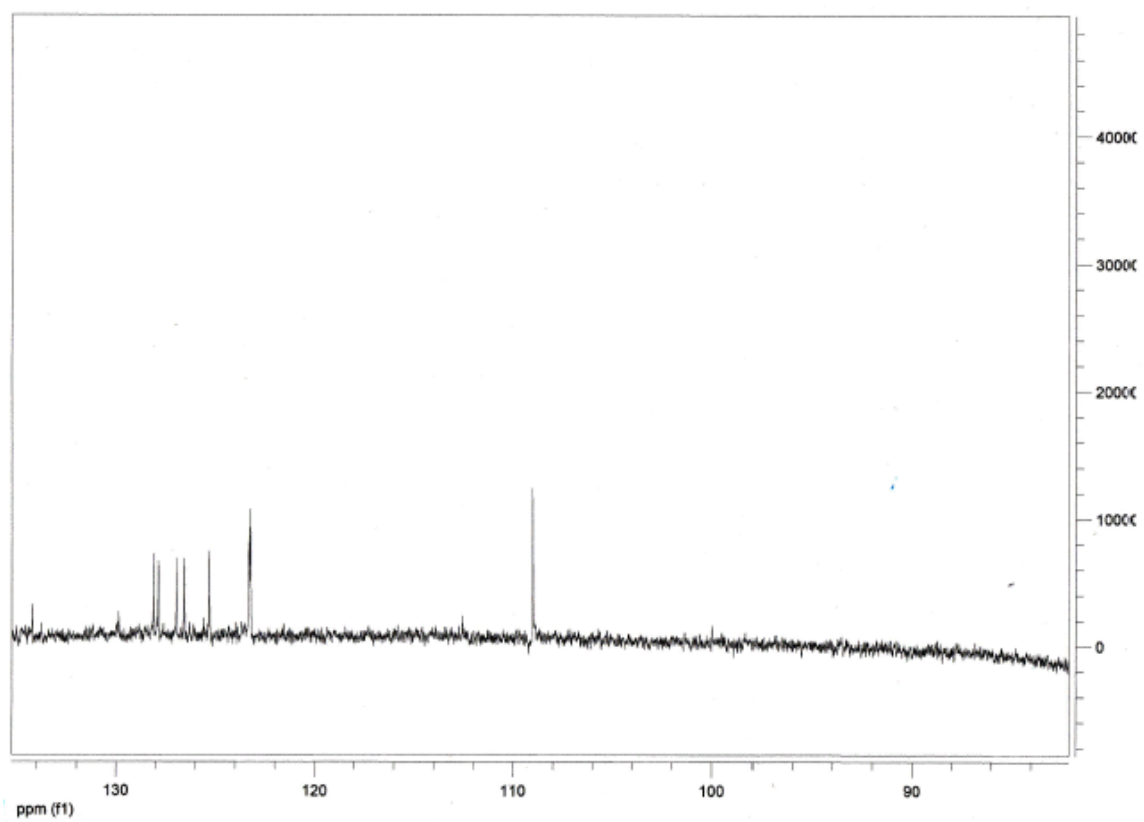

Captions: COSY  $^1\text{H}$ - $^1\text{H}$  (Connectivity  $^1\text{H}$ - $^1\text{H}$ )

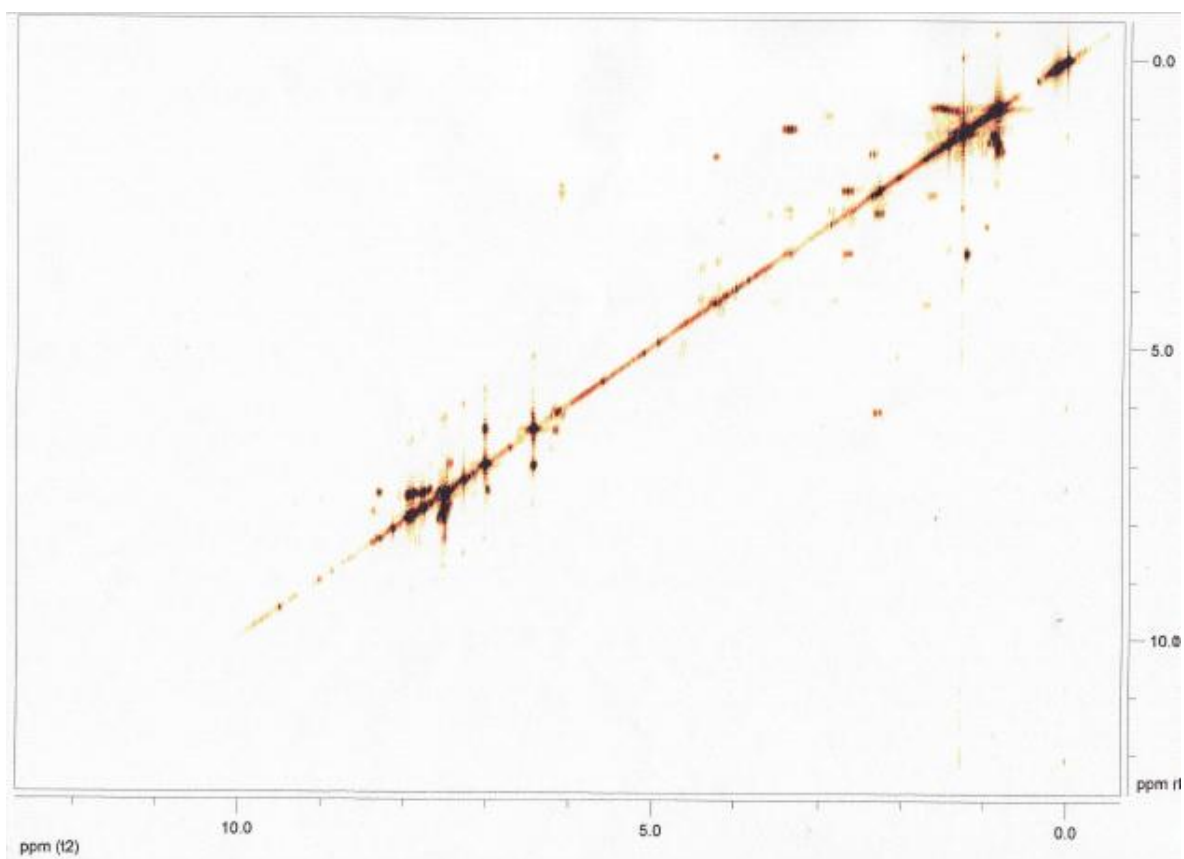

Captions: **IR spectra**

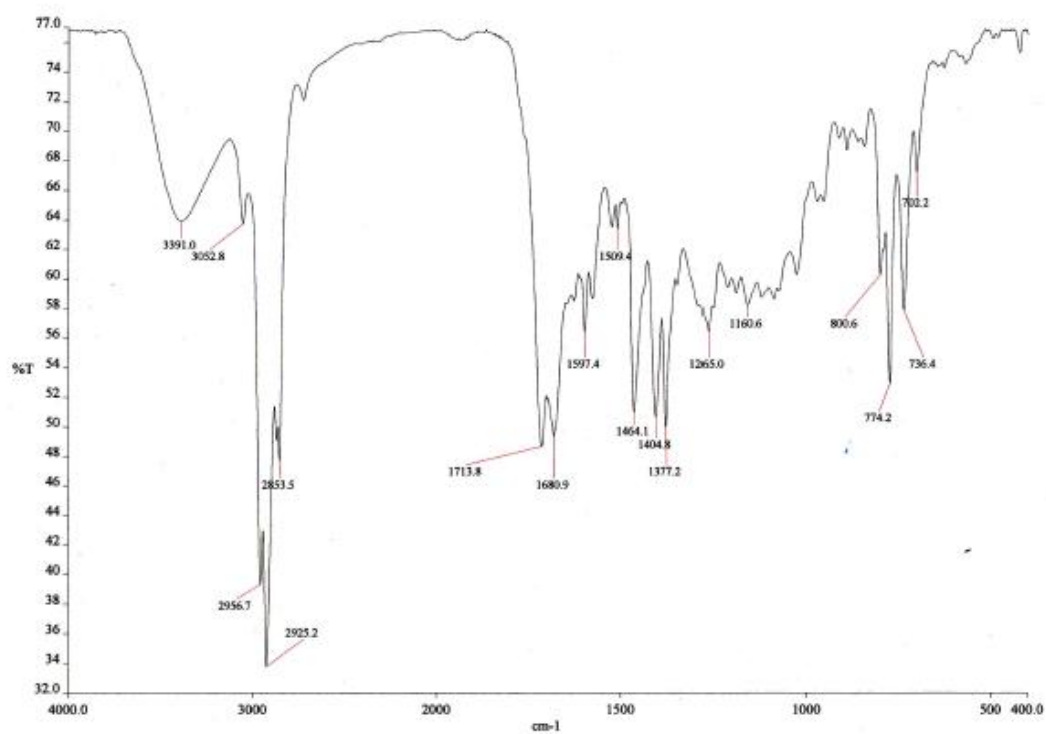

**Table S1.** Total (E, in au) and relative ( $\Delta E$ , in kcal/mol) energies, in gas phase and in benzene, of the stationary points involved in the reaction between 1-nitronaphtalene **1** and 1-trimethylsilyloxy-1,3-butadiene **3**.

|                         | MPWB1K/6-31G* |            | MPWB1K/6-311G**//<br>MPWB1K/6-31G* |            | MPWB1K/<br>6-311G**(benzene)//<br>MPWB1K/6-31G* |            |
|-------------------------|---------------|------------|------------------------------------|------------|-------------------------------------------------|------------|
|                         | E             | $\Delta E$ | E                                  | $\Delta E$ | E                                               | $\Delta E$ |
| <b>1</b>                | -590.107302   |            | -590.240443                        |            | -590.244204                                     |            |
| <i>s-trans</i> <b>3</b> | -639.737143   |            | -639.850635                        |            | -639.852978                                     |            |
| <b>TS1</b>              | -1229.816697  | 17.4       | -1230.063949                       | 17.0       | -1230.068926                                    | 17.7       |
| <b>10</b>               | -1229.869528  | -15.7      | -1230.116730                       | -16.1      | -1230.121052                                    | -15.0      |
| <b>TS2</b>              | -1229.815905  | 17.9       | -1230.065528                       | 16.0       | -1230.070252                                    | 16.9       |
| <b>11</b>               | -1024.284501  | -24.8      | -1024.474194                       | -28.0      | -1024.476860                                    | -27.6      |
| <b>5</b>                | -205.599532   |            | -205.661551                        |            | -205.664244                                     |            |

**Table S2.** Total (E, in au) and relative ( $\Delta E$ , in kcal/mol) energies, in gas phase and in 1-heptanol, of the stationary points involved in the reaction between complex **1-PIL** and 1-trimethylsilyloxy-1,3-butadiene **3**.

|                         | <i>Model I</i> |            |                                    |            | <i>Model II</i> |            |
|-------------------------|----------------|------------|------------------------------------|------------|-----------------|------------|
|                         | MPWB1K/6-31G*  |            | MPWB1K/6-311G**//<br>MPWB1K/6-31G* |            | MPWB1K/6-31G*   |            |
|                         | E              | $\Delta E$ | E                                  | $\Delta E$ | E               | $\Delta E$ |
| <b>1-PIL</b>            | -1280.437256   |            | -1280.763019                       |            | -1280.795405    |            |
| <i>s-trans</i> <b>3</b> | -639.737143    |            | -639.850635                        |            | -639.855551     |            |
| <b>TS1-PIL</b>          | -1920.157280   | 10.7       | -1920.596159                       | 11.0       | -1920.627254    | 14.9       |
| <b>10-PIL</b>           | -1920.200005   | -16.1      | -1920.639392                       | -16.2      | -1920.673716    | -14.3      |
| <b>TS2-PIL</b>          | -1920.152288   | 13.9       | -1920.593123                       | 12.9       | -1920.629917    | 13.2       |
| <b>11</b>               | -1024.284501   | -19.3      | -1024.474194                       | -22.7      | -1024.479967    | -25.0      |
| <b>5-PIL</b>            | -895.920578    |            | -896.175689                        |            | -896.210760     |            |

**Table S3.** MPWB1K/6-311G\*\* Total enthalpies (H, in au), entropies (S, in eu) and free energies (G, in au) in 1-heptanol, computed at 60 °C and 1 atm, of the stationary points involved in reaction *Model II*.

|                         | H            | S     | G            |
|-------------------------|--------------|-------|--------------|
| <b>1-PIL</b>            | -1280.481067 | 168.9 | -1280.570753 |
| <i>s-trans</i> <b>3</b> | -639.646095  | 113.2 | -639.705128  |
| <b>TS1-PIL</b>          | -1920.101516 | 220.3 | -1920.218491 |
| <b>10-PIL</b>           | -1920.143554 | 218.9 | -1920.259780 |
| <b>TS2-PIL</b>          | -1920.106364 | 219.1 | -1920.222692 |
| <b>11</b>               | -1024.126530 | 142.8 | -1024.202342 |
| <b>5-PIL</b>            | -896.037057  | 132.7 | -896.107507  |

Complete citation for reference 34

M. J. Frisch, G. W. Trucks, H. B. Schlegel, G. E. Scuseria, M. A. Robb, J. R. Cheeseman, G. Scalmani, V. Barone, B. Mennucci, G. A. Petersson, H. Nakatsuji, M. Caricato, X. Li, H. P. Hratchian, A. F. Izmaylov, J. Bloino, G. Zheng, J. L. Sonnenberg, M. Hada, M. Ehara, K. Toyota, R. Fukuda, J. Hasegawa, M. Ishida, T. Nakajima, Y. Honda, O. Kitao, H. Nakai, T. Vreven, J. A. Montgomery, Jr., J. E. Peralta, F. Ogliaro, M. Bearpark, J. J. Heyd, E. Brothers, K. N. Kudin, V. N. Staroverov, R. Kobayashi, J. Normand, K. Raghavachari, A. Rendell, J. C. Burant, S. S. Iyengar, J. Tomasi, M. Cossi, N. Rega, J. M. Millam, M. Klene, J. E. Knox, J. B. Cross, V. Bakken, C. Adamo, J. Jaramillo, R. Gomperts, R. E. Stratmann, O. Yazyev, A. J. Austin, R. Cammi, C. Pomelli, J. W. Ochterski, R. L. Martin, K. Morokuma, V. G. Zakrzewski, G. A. Voth, P. Salvador, J. J. Dannenberg, S. Dapprich, A. D. Daniels, O. Farkas, J. B. Foresman, J. V. Ortiz, J. Cioslowski, and D. J. Fox, *Gaussian 09, Revision A.01*, Gaussian, Inc., Wallingford CT, **2009**.

MPWB1K/6-31G\* computed total energies, unique frequency imaginary, and cartesian coordinates of the stationary points involved in the reaction between 1-nitronaphtalene **1** and 1-trimethylsilyloxy-1,3-butadiene **3**, and in the reaction between complex **1-PIL** and 1-trimethylsilyloxy-1,3-butadiene **3**.

**1**

E(RmPW+HF-B95) = -590.107302003 A.U.

|   |             |             |             |
|---|-------------|-------------|-------------|
| C | 0.00000000  | 0.00000000  | 0.00000000  |
| C | 0.00000000  | 0.00000000  | 1.36385105  |
| C | 1.18756638  | 0.00000000  | -0.77290276 |
| C | 1.21340689  | 0.03248501  | 2.05914069  |
| C | 2.38605194  | 0.04521834  | 1.36513981  |
| C | 2.40482672  | 0.01781635  | -0.04306537 |
| C | 3.63040154  | 0.00019587  | -0.73953843 |
| C | 1.25113852  | -0.06321646 | -2.18174299 |
| C | 2.45663396  | -0.09013251 | -2.81838600 |
| C | 3.66056746  | -0.05006628 | -2.09889973 |
| N | -1.31730460 | 0.01916049  | -0.61749377 |
| O | -2.23211430 | -0.46112683 | 0.01021157  |
| O | -1.43466158 | 0.53684513  | -1.70435155 |
| H | -0.94271869 | -0.01639406 | 1.88358619  |
| H | 1.20983642  | 0.04993783  | 3.13721636  |
| H | 3.32999319  | 0.07076746  | 1.88954994  |
| H | 4.54641129  | 0.02076654  | -0.16771724 |
| H | 0.34257778  | -0.08695915 | -2.75395895 |
| H | 2.48222686  | -0.14195404 | -3.89604121 |
| H | 4.60309649  | -0.06586802 | -2.62391541 |

*s-trans* **3**

E(RmPW+HF-B95) = -639.73714301 A.U.

|    |             |             |             |
|----|-------------|-------------|-------------|
| C  | -1.00691000 | -0.10511700 | -0.06576500 |
| C  | -2.21867400 | 0.44303600  | -0.03801500 |
| C  | -3.42432400 | -0.34954900 | -0.00227600 |
| C  | -4.65828000 | 0.14353400  | 0.02613200  |
| O  | 0.11960800  | 0.62092800  | -0.11040400 |
| H  | -0.88585200 | -1.18450700 | -0.06278600 |
| H  | -2.30321900 | 1.52064700  | -0.04434800 |
| H  | -4.84027800 | 1.20858900  | 0.02361900  |
| H  | -5.52378900 | -0.49924800 | 0.05263000  |
| Si | 1.67448500  | 0.00226900  | 0.00835600  |
| C  | 2.77533900  | 1.47973400  | -0.21970900 |
| H  | 3.82675800  | 1.20578000  | -0.14894600 |
| H  | 2.61254700  | 1.93730800  | -1.19344500 |
| H  | 2.57350900  | 2.23281300  | 0.53937400  |
| C  | 1.88689300  | -0.77493200 | 1.68951600  |
| H  | 1.73090700  | -0.04234000 | 2.47923700  |
| H  | 1.17778400  | -1.58631600 | 1.84823500  |



|   |             |             |             |
|---|-------------|-------------|-------------|
| H | 2.88797500  | -1.18733500 | 1.80891500  |
| C | 1.92632400  | -1.26621100 | -1.33580700 |
| H | 2.93780900  | -1.66928400 | -1.30305300 |
| H | 1.23975400  | -2.10613200 | -1.23878300 |
| H | 1.77459000  | -0.82691300 | -2.32004600 |
| H | -3.29035100 | -1.42521700 | 0.00119600  |

*s-cis* **3**

E(RmPW+HF-B95) = -639.732787840 A.U.

|    |             |             |             |
|----|-------------|-------------|-------------|
| C  | 0.00000000  | 0.00000000  | 0.00000000  |
| C  | 0.00000000  | 0.00000000  | 1.33247341  |
| C  | 1.22746088  | 0.00000000  | 2.11552343  |
| C  | 2.35417300  | 0.62249871  | 1.78821911  |
| O  | -1.05816993 | 0.02808191  | -0.81778291 |
| H  | 0.93230228  | -0.04413576 | -0.54658913 |
| H  | -0.93644302 | -0.03797019 | 1.87263469  |
| H  | 2.42168508  | 1.24372157  | 0.90677194  |
| H  | 3.24224724  | 0.53487472  | 2.39457771  |
| Si | -2.68843827 | 0.23913357  | -0.47756042 |
| C  | -3.47360843 | 0.32786566  | -2.15973107 |
| H  | -4.55224428 | 0.45797898  | -2.08551142 |
| H  | -3.07438355 | 1.16270907  | -2.73223366 |
| H  | -3.28492008 | -0.58271908 | -2.72492011 |
| C  | -3.33573978 | -1.22999805 | 0.47323700  |
| H  | -3.15515854 | -2.15190892 | -0.07675462 |
| H  | -2.87287969 | -1.33476953 | 1.45206018  |
| H  | -4.41101448 | -1.14033265 | 0.62453186  |
| C  | -2.93851179 | 1.82886902  | 0.46417994  |
| H  | -3.99934477 | 2.00171642  | 0.64219482  |
| H  | -2.43623115 | 1.82562968  | 1.42873672  |
| H  | -2.55599324 | 2.67589163  | -0.10260793 |
| H  | 1.19832192  | -0.56236839 | 3.04112439  |

**TS1**

E(RmPW+HF-B95) = -1229.81669667 A.U.

1 imaginary frequencies -467.4844 cm-1

|   |             |             |             |
|---|-------------|-------------|-------------|
| C | 0.00000000  | 0.00000000  | 0.00000000  |
| C | 0.00000000  | 0.00000000  | 1.36638874  |
| C | 1.18032305  | 0.00000000  | 2.10649916  |
| C | 2.46004712  | 0.00364808  | 1.55671285  |
| O | -1.03275254 | 0.24864149  | -0.75963839 |
| H | 0.87414621  | -0.28263394 | -0.56674174 |
| H | -0.92746694 | 0.17623692  | 1.88590852  |
| H | 2.61678555  | -0.49249083 | 0.60910988  |
| H | 3.28671911  | -0.12185365 | 2.24165109  |
| C | 1.79519804  | 2.09642745  | -0.08046034 |

|    |             |             |             |
|----|-------------|-------------|-------------|
| C  | 2.79110792  | 1.77970763  | 0.88222444  |
| C  | 2.02021091  | 1.92006399  | -1.49220229 |
| C  | 4.14539645  | 1.62644659  | 0.39079227  |
| C  | 4.38762028  | 1.50541038  | -0.91912074 |
| C  | 3.33644279  | 1.58648566  | -1.89129331 |
| C  | 3.62687963  | 1.37271114  | -3.24015784 |
| C  | 1.04117454  | 2.01381078  | -2.49535924 |
| C  | 1.35664806  | 1.79124106  | -3.81415419 |
| C  | 2.65303176  | 1.47096012  | -4.20081478 |
| N  | 0.65627724  | 2.72409074  | 0.44540016  |
| O  | 0.58581294  | 2.85730837  | 1.66517089  |
| O  | -0.23212211 | 3.12100235  | -0.30263057 |
| H  | 2.67773210  | 2.29779231  | 1.81972338  |
| H  | 4.94604214  | 1.57431082  | 1.11303993  |
| H  | 5.39652383  | 1.36203796  | -1.27880822 |
| H  | 4.64310690  | 1.12860603  | -3.51492411 |
| H  | 0.03170660  | 2.25304278  | -2.22451240 |
| H  | 0.57749033  | 1.86754319  | -4.55767858 |
| H  | 2.88995880  | 1.30328526  | -5.24014840 |
| Si | -2.59074246 | 0.89802309  | -0.48923710 |
| C  | -2.87550055 | 2.00328186  | -1.95126149 |
| H  | -3.92554503 | 2.28474466  | -2.02193694 |
| H  | -2.28582480 | 2.91201372  | -1.86226112 |
| H  | -2.60170366 | 1.50113036  | -2.87734631 |
| C  | -3.71654867 | -0.58719152 | -0.53539989 |
| H  | -3.63156855 | -1.11955619 | -1.48074459 |
| H  | -3.48085529 | -1.28779379 | 0.26422050  |
| H  | -4.75664718 | -0.28654102 | -0.41364202 |
| C  | -2.75653681 | 1.80201010  | 1.12879860  |
| H  | -2.97112317 | 1.13541778  | 1.96222864  |
| H  | -1.87480080 | 2.39590504  | 1.36099666  |
| H  | -3.59753022 | 2.49084015  | 1.04093099  |
| H  | 1.08590061  | 0.15735188  | 3.17117369  |

## 10

E(RmPW+HF-B95) = -1229.86952770 A.U.

|   |             |             |             |
|---|-------------|-------------|-------------|
| C | 0.56479900  | 0.38255200  | -0.84294900 |
| C | 1.18593800  | 1.69592300  | -1.18975700 |
| C | 0.42961800  | 2.75639000  | -1.41797800 |
| C | -1.02836700 | 2.66940400  | -1.12681200 |
| O | 1.43685800  | -0.58379700 | -0.36347500 |
| H | 0.12858100  | -0.00481000 | -1.76768700 |
| H | 2.25177400  | 1.71297300  | -1.36207900 |
| H | -1.57397700 | 2.14581300  | -1.91557100 |
| H | -1.47515200 | 3.65765100  | -1.04447400 |
| C | -0.66522700 | 0.49830900  | 0.13078100  |
| C | -1.20144900 | 1.92960900  | 0.20486700  |
| C | -1.71036000 | -0.54082500 | -0.18165700 |
| C | -2.60235600 | 2.02208300  | 0.69660400  |

|    |             |             |             |
|----|-------------|-------------|-------------|
| C  | -3.45037700 | 1.00514400  | 0.63948300  |
| C  | -3.05284200 | -0.28092800 | 0.09625400  |
| C  | -4.00640500 | -1.25730200 | -0.16483100 |
| C  | -1.35360900 | -1.77606200 | -0.70016900 |
| C  | -2.31076300 | -2.73802700 | -0.96140200 |
| C  | -3.64323000 | -2.47760300 | -0.69456700 |
| N  | -0.06895900 | 0.18740100  | 1.50403600  |
| O  | 0.69281200  | 1.01208700  | 1.95154500  |
| O  | -0.33858100 | -0.85723800 | 2.02715200  |
| H  | -0.54615000 | 2.44459300  | 0.90303000  |
| H  | -2.92086800 | 2.98494700  | 1.07008200  |
| H  | -4.47246900 | 1.11514800  | 0.97229400  |
| H  | -5.04382800 | -1.04561100 | 0.05044200  |
| H  | -0.31190500 | -1.99581200 | -0.87564500 |
| H  | -2.01300900 | -3.69470400 | -1.36221700 |
| H  | -4.39525600 | -3.22586100 | -0.89390700 |
| Si | 3.07549000  | -0.64809500 | -0.04127100 |
| C  | 3.27882200  | -2.31987300 | 0.74487000  |
| H  | 4.31102600  | -2.49248600 | 1.04603300  |
| H  | 2.65134500  | -2.39921300 | 1.63063500  |
| H  | 2.99140500  | -3.11616000 | 0.06100200  |
| C  | 4.03305300  | -0.56871400 | -1.64730200 |
| H  | 3.97572200  | 0.40236200  | -2.13618500 |
| H  | 5.08748000  | -0.77526200 | -1.46482200 |
| H  | 3.66990200  | -1.31529500 | -2.35184900 |
| C  | 3.63868100  | 0.69750400  | 1.11874900  |
| H  | 4.72372900  | 0.66279100  | 1.22014100  |
| H  | 3.36644400  | 1.69368400  | 0.77678700  |
| H  | 3.19722000  | 0.56547200  | 2.10321500  |
| H  | 0.85957200  | 3.68738900  | -1.75656100 |

## TS2

E(RmPW+HF-B95) = -1229.81590509 A.U.

1 imaginary frequencies -1025.4338 cm-1

|    |             |             |             |
|----|-------------|-------------|-------------|
| C  | 0.00000000  | 0.00000000  | 0.00000000  |
| C  | 0.00000000  | 0.00000000  | 1.49387621  |
| C  | 1.09225350  | 0.00000000  | 2.23674692  |
| C  | 2.44684811  | -0.07895497 | 1.63642955  |
| O  | -1.12072748 | -0.61908372 | -0.54181190 |
| Si | -2.41833271 | -1.44895088 | 0.10871757  |
| C  | 1.29513652  | -0.52730806 | -0.60353724 |
| C  | 2.42893203  | -0.71297575 | 0.25619127  |
| C  | 1.48716576  | -0.43247348 | -2.03080967 |
| C  | 3.73294007  | -0.85725118 | -0.37106567 |
| C  | 3.88763974  | -0.87966730 | -1.69895226 |
| C  | 2.77528244  | -0.63580152 | -2.56710259 |
| C  | 2.96430120  | -0.54647982 | -3.94804137 |
| C  | 0.43723972  | -0.11395016 | -2.90368313 |
| C  | 0.65216443  | -0.01266295 | -4.25489687 |

|   |             |             |             |
|---|-------------|-------------|-------------|
| C | 1.92079215  | -0.23894396 | -4.78312493 |
| N | 0.73693779  | -2.66259234 | -0.47671931 |
| H | 2.14662019  | -1.91094541 | 0.52255208  |
| H | 4.58200787  | -0.99362991 | 0.28362031  |
| H | 4.86009269  | -1.03271326 | -2.14274376 |
| H | -0.55196046 | 0.02650750  | -2.50509059 |
| H | -0.16989086 | 0.22956141  | -4.91049343 |
| H | 2.08365859  | -0.16910785 | -5.84797864 |
| H | 3.95369789  | -0.71240818 | -4.34832586 |
| H | -0.03471210 | 1.04991105  | -0.32228312 |
| H | 2.88332729  | 0.92179775  | 1.57678452  |
| H | 3.11240128  | -0.65382410 | 2.27985591  |
| H | -0.97342533 | 0.09196255  | 1.95431675  |
| O | 1.49924093  | -3.11485652 | 0.39598105  |
| O | -0.01917833 | -3.37987504 | -1.06366464 |
| C | -1.91991268 | -2.73376509 | 1.37169104  |
| H | -1.65690895 | -3.67071919 | 0.88762450  |
| H | -1.06275521 | -2.42434136 | 1.96661291  |
| H | -2.74725867 | -2.92312795 | 2.05534326  |
| C | -3.22150371 | -2.22325146 | -1.37562986 |
| H | -4.07383588 | -2.83724527 | -1.08803087 |
| H | -3.57292198 | -1.46806273 | -2.07638209 |
| H | -2.50005289 | -2.85537563 | -1.88729463 |
| C | -3.60012780 | -0.22306438 | 0.89339030  |
| H | -3.82364519 | 0.59319304  | 0.20815945  |
| H | -4.54192562 | -0.71835000 | 1.13038887  |
| H | -3.22699179 | 0.21347457  | 1.81874794  |
| H | 1.01476848  | 0.07277938  | 3.31206950  |

## 11

E(RmPW+HF-B95) = -1024.28450085 A.U.

|    |             |             |             |
|----|-------------|-------------|-------------|
| C  | 0.00000000  | 0.00000000  | 0.00000000  |
| C  | 0.00000000  | 0.00000000  | 1.48873060  |
| C  | 1.10241825  | 0.00000000  | 2.22037634  |
| C  | 2.46766588  | 0.05557314  | 1.63760933  |
| O  | -0.69152668 | -1.13106334 | -0.49042766 |
| Si | -0.45947322 | -2.73519021 | -0.10664024 |
| C  | 1.36559132  | 0.12780605  | -0.61668697 |
| C  | 2.50188953  | 0.14769233  | 0.14423230  |
| C  | 1.45327051  | 0.25167074  | -2.03373737 |
| C  | 3.76315026  | 0.26954540  | -0.48060875 |
| C  | 3.87336248  | 0.37986087  | -1.82824511 |
| C  | 2.72146920  | 0.38315406  | -2.64301506 |
| C  | 2.81228652  | 0.52546587  | -4.04091005 |
| C  | 0.31194635  | 0.26810436  | -2.86404165 |
| C  | 0.42971562  | 0.41568615  | -4.21604739 |
| C  | 1.69095590  | 0.54496279  | -4.81557548 |
| H  | 4.64923137  | 0.27671412  | 0.13870243  |

|   |             |             |             |
|---|-------------|-------------|-------------|
| H | 4.84322472  | 0.47585146  | -2.29486685 |
| H | -0.66364743 | 0.13800583  | -2.42649350 |
| H | -0.45729057 | 0.42734028  | -4.83133836 |
| H | 1.77003682  | 0.65713107  | -5.88624630 |
| H | 3.79149206  | 0.62351704  | -4.48744902 |
| H | -0.59649427 | 0.85083940  | -0.33933537 |
| H | 3.00717982  | 0.90710390  | 2.06077432  |
| H | 3.03605498  | -0.82183536 | 1.96079296  |
| H | -0.97515446 | -0.03821213 | 1.95370436  |
| C | 1.35159339  | -3.15797715 | 0.05926616  |
| H | 1.91497640  | -2.86941441 | -0.82619400 |
| H | 1.79689354  | -2.65608181 | 0.91709631  |
| H | 1.47403192  | -4.23125829 | 0.20519728  |
| C | -1.23070998 | -3.64756241 | -1.53571844 |
| H | -1.17901142 | -4.72621771 | -1.39395406 |
| H | -2.27889608 | -3.37610343 | -1.64794465 |
| H | -0.72389973 | -3.40508335 | -2.46786345 |
| C | -1.34711943 | -3.17321709 | 1.47968301  |
| H | -2.39541842 | -2.88167920 | 1.43578109  |
| H | -1.31042602 | -4.24807321 | 1.65656225  |
| H | -0.89677324 | -2.68010199 | 2.33875219  |
| H | 1.03387127  | -0.02843146 | 3.29951038  |

### 1-PIL

E(RmPW+HF-B95) = -1280.43725617 A.U.

|   |             |             |             |
|---|-------------|-------------|-------------|
| C | 0.00000000  | 0.00000000  | 0.00000000  |
| C | 0.00000000  | 0.00000000  | 1.36867502  |
| C | 1.19820315  | 0.00000000  | -0.77025948 |
| C | 1.19987505  | -0.01811155 | 2.07636987  |
| C | 2.37626184  | -0.02664480 | 1.38789595  |
| C | 2.40588903  | -0.01104871 | -0.01914832 |
| C | 2.51976274  | 0.05985577  | -2.78639520 |
| C | 3.70857726  | 0.02949592  | -2.04534261 |
| N | -1.30780390 | -0.01768661 | -0.60634696 |
| H | -0.94436607 | 0.00349780  | 1.88548541  |
| H | 1.18556970  | -0.03049853 | 3.15394622  |
| H | 3.31737068  | -0.04414490 | 1.91759466  |
| H | 2.56369288  | 0.09318658  | -3.86396928 |
| H | 4.66128477  | 0.03612385  | -2.55116167 |
| O | -2.26780883 | 0.29026109  | 0.06656899  |
| O | -1.40933794 | -0.35659710 | -1.77052025 |
| H | -7.31110715 | -1.04534579 | -4.77956155 |
| C | -6.91043376 | -0.03943419 | -4.73943741 |
| N | -4.22038237 | 0.02257134  | -2.43334251 |
| C | -4.71580469 | -0.19411235 | -3.63895853 |
| C | -5.21355718 | 0.44449918  | -1.59827156 |
| N | -6.00543821 | 0.08160650  | -3.60893664 |

|   |             |             |             |
|---|-------------|-------------|-------------|
| H | -7.70669232 | 0.68449155  | -4.61062548 |
| H | -6.34824365 | 0.15323671  | -5.64428204 |
| C | -6.34023453 | 0.48048953  | -2.34093218 |
| H | -7.34375482 | 0.75667471  | -2.08483192 |
| H | -4.13732514 | -0.53718218 | -4.48150212 |
| H | -5.03067659 | 0.68054184  | -0.56955793 |
| H | -3.24713954 | -0.11899185 | -2.17961158 |
| B | -4.04500994 | -1.11316152 | -6.61096238 |
| F | -5.01961751 | -1.89855206 | -5.97380783 |
| F | -4.53679049 | 0.20611296  | -6.63107011 |
| F | -2.90931007 | -1.11361641 | -5.78093997 |
| F | -3.76281964 | -1.56628920 | -7.85993564 |
| C | 1.29773456  | 0.04470090  | -2.17704084 |
| H | 0.41311684  | 0.06140441  | -2.78276028 |
| C | 3.64666743  | -0.00212325 | -0.68675082 |
| H | 4.54813003  | -0.01696578 | -0.09244560 |

### TS1-PIL

E(RmPW+HF-B95) = -1920.15728045 A.U.

1 imaginary frequencies -469.3229 cm-1

|   |             |             |             |
|---|-------------|-------------|-------------|
| C | 0.00000000  | 0.00000000  | 0.00000000  |
| C | 0.00000000  | 0.00000000  | 1.36242811  |
| C | 1.14943073  | 0.00000000  | 2.15848200  |
| C | 2.46442453  | 0.03227430  | 1.70594472  |
| O | -1.10785417 | 0.14946586  | -0.66126166 |
| H | 0.91066683  | -0.13011587 | -0.57583537 |
| H | -0.96237191 | 0.09769212  | 1.84125485  |
| H | 2.67840724  | -0.33577731 | 0.71223910  |
| H | 3.23457852  | -0.19606569 | 2.42838505  |
| C | 2.00116750  | 2.32956712  | 0.32325304  |
| C | 2.91563495  | 1.88949296  | 1.31937102  |
| C | 2.33485909  | 2.30609302  | -1.07654348 |
| C | 4.29855159  | 1.74861231  | 0.92966824  |
| C | 4.63904315  | 1.75408213  | -0.36477520 |
| C | 3.67379279  | 1.97557835  | -1.40016049 |
| C | 4.07949610  | 1.91474801  | -2.73443653 |
| C | 1.46488790  | 2.59605297  | -2.13978502 |
| C | 1.89580881  | 2.52886926  | -3.44514556 |
| C | 3.20446505  | 2.17809877  | -3.75687351 |
| N | 0.78406346  | 2.75256690  | 0.82098918  |
| O | 0.62340436  | 2.78149893  | 2.04535105  |
| O | -0.15206757 | 3.03157887  | 0.05552002  |
| H | 2.72822887  | 2.26904357  | 2.30891881  |
| H | 5.03634471  | 1.59633486  | 1.70221349  |
| H | 5.66919845  | 1.61582746  | -0.66014771 |
| H | 5.10811858  | 1.66195794  | -2.94751999 |
| H | 0.45613672  | 2.89252077  | -1.92839064 |
| H | 1.19925778  | 2.76315371  | -4.23654121 |
| H | 3.52967816  | 2.12955266  | -4.78433163 |

|    |             |             |             |
|----|-------------|-------------|-------------|
| Si | -1.53956886 | -0.14827051 | -2.29784238 |
| C  | -3.00823680 | -1.27189293 | -2.14762347 |
| H  | -3.36443313 | -1.57268745 | -3.13193759 |
| H  | -2.77763022 | -2.17341766 | -1.58358635 |
| H  | -3.82634268 | -0.75442838 | -1.64940420 |
| C  | -1.99171249 | 1.44356417  | -3.11759777 |
| H  | -2.71983523 | 2.02157485  | -2.55002113 |
| H  | -1.12550148 | 2.07094178  | -3.30848777 |
| H  | -2.44913956 | 1.21688954  | -4.08145350 |
| C  | -0.07334995 | -0.98404778 | -3.09004817 |
| H  | 0.79789361  | -0.33156220 | -3.12801527 |
| H  | 0.20417276  | -1.90236475 | -2.57435287 |
| H  | -0.31918865 | -1.25113825 | -4.11727759 |
| H  | 0.99026637  | 0.06595856  | 3.22544030  |
| H  | -6.29155952 | 1.69024817  | 1.92824216  |
| C  | -5.92094141 | 2.68096806  | 2.16216701  |
| N  | -2.42021739 | 2.81406623  | 1.62878038  |
| C  | -3.66435475 | 2.92053235  | 1.20676531  |
| C  | -2.41482770 | 2.47589828  | 2.94947743  |
| N  | -4.47094143 | 2.66183943  | 2.22123937  |
| H  | -6.29258935 | 3.00616993  | 3.12726253  |
| H  | -6.21758682 | 3.36633870  | 1.37926401  |
| C  | -3.70862793 | 2.37368214  | 3.32302671  |
| H  | -4.15445977 | 2.13627022  | 4.26853045  |
| H  | -3.95099252 | 3.19166398  | 0.20603495  |
| H  | -1.49854228 | 2.35896928  | 3.49215791  |
| H  | -1.57922271 | 2.99154609  | 1.06498583  |
| B  | -5.54683152 | 3.41812115  | -1.34691566 |
| F  | -5.76659054 | 2.17459310  | -0.73566424 |
| F  | -5.76136059 | 4.40473419  | -0.37334408 |
| F  | -4.17507690 | 3.46508590  | -1.68602546 |
| F  | -6.33797530 | 3.59837459  | -2.43628228 |

### 10-PIL

E(RmPW+HF-B95) = -1920.20000475 A.U

|   |             |             |             |
|---|-------------|-------------|-------------|
| C | 0.00000000  | 0.00000000  | 0.00000000  |
| C | 0.00000000  | 0.00000000  | 1.49307773  |
| C | 1.14712063  | 0.00000000  | 2.15334253  |
| C | 2.41600894  | 0.17375350  | 1.38962463  |
| O | -1.21781179 | 0.29579936  | -0.59720176 |
| H | 0.28806242  | -1.00705759 | -0.31371311 |
| H | -0.94823005 | -0.10355454 | 1.99765344  |
| H | 2.71977690  | -0.74798202 | 0.88817763  |
| H | 3.23697893  | 0.45513892  | 2.04468347  |
| C | 1.10497360  | 0.90963558  | -0.64521635 |
| C | 2.20186562  | 1.28548007  | 0.35373870  |
| C | 1.60337909  | 0.32642739  | -1.94171121 |
| C | 3.47954411  | 1.70061391  | -0.28617651 |
| C | 3.79635428  | 1.38244571  | -1.53346188 |

|    |             |             |             |
|----|-------------|-------------|-------------|
| C  | 2.90430992  | 0.59686784  | -2.36677261 |
| C  | 3.34346380  | 0.09026295  | -3.58383419 |
| C  | 0.77036680  | -0.43531602 | -2.74674509 |
| C  | 1.21964173  | -0.93772262 | -3.95286395 |
| C  | 2.51060947  | -0.67433037 | -4.37360578 |
| N  | 0.35625075  | 2.20499887  | -0.96271292 |
| O  | 0.00427272  | 2.88711639  | -0.02973122 |
| O  | 0.10525103  | 2.46425441  | -2.11297145 |
| H  | 1.80546726  | 2.12334487  | 0.92243841  |
| H  | 4.17127191  | 2.25165130  | 0.33476992  |
| H  | 4.74649073  | 1.67752426  | -1.95448630 |
| H  | 4.35239444  | 0.30319136  | -3.90546236 |
| H  | -0.24966729 | -0.61142586 | -2.44407499 |
| H  | 0.55439112  | -1.52072200 | -4.57038589 |
| H  | 2.86413714  | -1.05741922 | -5.31843333 |
| Si | -2.78579684 | 0.50313568  | -0.05101376 |
| C  | -3.73646712 | 0.81000381  | -1.61591539 |
| H  | -4.77592253 | 1.05833328  | -1.40697123 |
| H  | -3.30083575 | 1.63890248  | -2.17120257 |
| H  | -3.72647390 | -0.06162421 | -2.26713118 |
| C  | -3.39325867 | -1.04230747 | 0.80460632  |
| H  | -2.91105587 | -1.23013255 | 1.76188843  |
| H  | -4.46356525 | -0.96204396 | 0.99331150  |
| H  | -3.23871054 | -1.91886014 | 0.17743100  |
| C  | -2.90092958 | 1.98395527  | 1.07991004  |
| H  | -3.89816903 | 2.05302588  | 1.51380256  |
| H  | -2.18106765 | 1.95352386  | 1.89540557  |
| H  | -2.71898260 | 2.89758502  | 0.51783192  |
| H  | 1.17265496  | -0.07934519 | 3.22997978  |
| H  | -3.98277134 | 7.62161365  | -3.39526430 |
| C  | -2.92857792 | 7.84655675  | -3.28611749 |
| N  | -1.26949380 | 5.02522660  | -1.92436636 |
| C  | -1.74651899 | 5.71766930  | -2.94411307 |
| C  | -1.52204621 | 5.69414768  | -0.76118676 |
| N  | -2.29239742 | 6.82241177  | -2.47430717 |
| H  | -2.78894147 | 8.80162408  | -2.79274484 |
| H  | -2.46287708 | 7.83611628  | -4.26347424 |
| C  | -2.16661610 | 6.82750629  | -1.10911389 |
| H  | -2.53976310 | 7.63595582  | -0.51237426 |
| H  | -1.68239372 | 5.40510272  | -3.97416348 |
| H  | -1.21548992 | 5.31273194  | 0.19181844  |
| H  | -0.80432630 | 4.12466564  | -2.00245449 |
| B  | -2.10204689 | 5.80102943  | -6.09759772 |
| F  | -3.31592518 | 5.91131906  | -5.39808383 |
| F  | -1.29300072 | 6.87012657  | -5.66388957 |
| F  | -1.48344712 | 4.61693139  | -5.66529423 |
| F  | -2.28615259 | 5.82097046  | -7.44328615 |

**TS2-PIL**

E(RmPW+HF-B95) = -1920.15228811 A.U.



1 imaginary frequencies -246.9239 cm-1

|    |             |             |             |
|----|-------------|-------------|-------------|
| C  | 0.00000000  | 0.00000000  | 0.00000000  |
| C  | 0.00000000  | 0.00000000  | 1.49558088  |
| C  | 1.09059799  | 0.00000000  | 2.24049370  |
| C  | 2.44607705  | 0.08435887  | 1.64042519  |
| O  | -1.10395907 | 0.62189491  | -0.55547527 |
| H  | -0.02295316 | -1.05458657 | -0.31577792 |
| H  | -0.97470651 | -0.09130601 | 1.95319302  |
| H  | 2.88118532  | -0.91328680 | 1.54570166  |
| H  | 3.11711649  | 0.64432796  | 2.28975013  |
| C  | 1.30111292  | 0.51460366  | -0.59692566 |
| C  | 2.41817788  | 0.76017873  | 0.27768868  |
| C  | 1.48644301  | 0.53516807  | -2.00957914 |
| C  | 3.72648082  | 0.95953651  | -0.33365520 |
| C  | 3.88102733  | 1.03346458  | -1.65921276 |
| C  | 2.77232347  | 0.81101465  | -2.53371328 |
| C  | 2.95892886  | 0.82475190  | -3.91734110 |
| C  | 0.44038128  | 0.24348456  | -2.90602280 |
| C  | 0.65646629  | 0.24470094  | -4.25719882 |
| C  | 1.91949359  | 0.54807430  | -4.76728118 |
| N  | 0.58680905  | 2.81490939  | -0.29315406 |
| O  | 1.38655897  | 3.22866035  | 0.56295542  |
| O  | -0.24793273 | 3.58116974  | -0.72463948 |
| H  | 2.11047614  | 1.88398321  | 0.55424675  |
| H  | 4.56546662  | 1.10061737  | 0.33191113  |
| H  | 4.84839513  | 1.22729027  | -2.09751016 |
| H  | 3.93998555  | 1.04838075  | -4.30855460 |
| H  | -0.54209061 | 0.04553457  | -2.51654757 |
| H  | -0.15731698 | 0.02566516  | -4.93024385 |
| H  | 2.07928549  | 0.56105965  | -5.83461292 |
| Si | -2.49260229 | 1.32274900  | 0.08087637  |
| C  | -3.25452636 | 2.17851565  | -1.37508159 |
| H  | -4.17632106 | 2.68410999  | -1.09097743 |
| H  | -2.56982057 | 2.92724436  | -1.76627155 |
| H  | -3.49168319 | 1.47713853  | -2.17304325 |
| C  | -3.60844551 | -0.05166602 | 0.69126892  |
| H  | -3.20012028 | -0.58966728 | 1.54628514  |
| H  | -4.56959760 | 0.35886379  | 1.00038360  |
| H  | -3.80146536 | -0.77865680 | -0.09599630 |
| C  | -2.13277843 | 2.50560435  | 1.49049966  |
| H  | -2.78039175 | 2.29987590  | 2.34168935  |
| H  | -1.10295517 | 2.45110925  | 1.83729933  |
| H  | -2.31583862 | 3.52964358  | 1.17109487  |
| H  | 1.01260712  | -0.07687588 | 3.31510374  |
| H  | -1.34837219 | 9.46252370  | 2.17428505  |
| C  | -0.62802078 | 9.41302484  | 1.36744023  |
| N  | 0.14969050  | 6.03524575  | 0.61443154  |
| C  | -0.55555900 | 7.13811029  | 0.43302504  |
| C  | 1.08107069  | 6.25346087  | 1.58654133  |

|   |             |             |             |
|---|-------------|-------------|-------------|
| N | -0.10431233 | 8.06320383  | 1.25961371  |
| H | 0.20214862  | 10.08337360 | 1.56058250  |
| H | -1.11595634 | 9.66303105  | 0.43408212  |
| C | 0.92057490  | 7.52891972  | 1.99605582  |
| H | 1.44117584  | 8.10378650  | 2.73594886  |
| H | -1.35624106 | 7.23950734  | -0.28236918 |
| H | 1.76295013  | 5.48388564  | 1.88744008  |
| H | 0.01468656  | 5.15825938  | 0.10010539  |
| B | -2.99413610 | 8.47842342  | -1.18866054 |
| F | -3.16601666 | 8.45243747  | 0.20538232  |
| F | -1.85355617 | 9.26004124  | -1.44323332 |
| F | -2.69824075 | 7.16503210  | -1.59336539 |
| F | -4.09641745 | 8.96490059  | -1.82002240 |

### 5-PIL

E(RmPW+HF-B95) = -895.920578372 A.U.

|   |             |             |             |
|---|-------------|-------------|-------------|
| N | 0.00000000  | 0.00000000  | 0.00000000  |
| O | 0.00000000  | 0.00000000  | 1.36446724  |
| O | 1.09277824  | 0.00000000  | -0.41316331 |
| H | -0.93474819 | -0.00675958 | 1.60373887  |
| H | 6.71391216  | 1.78224143  | 3.02081475  |
| C | 6.43649647  | 0.74282960  | 3.14868130  |
| N | 3.17415040  | 0.24206750  | 1.84705641  |
| C | 4.48937899  | 0.26962513  | 1.69668448  |
| C | 2.84411976  | 0.55534613  | 3.13317750  |
| N | 5.01852898  | 0.58465545  | 2.86549307  |
| H | 6.60899040  | 0.42095166  | 4.16935793  |
| H | 6.99434398  | 0.14003394  | 2.44444517  |
| C | 4.01033394  | 0.77068263  | 3.77438067  |
| H | 4.21457420  | 1.03528888  | 4.79283262  |
| H | 5.00734022  | 0.06462510  | 0.76965500  |
| H | 1.82854997  | 0.59188040  | 3.47032314  |
| H | 2.52236785  | 0.05319571  | 1.09967231  |
| B | 6.97816542  | 0.18828185  | -0.26824152 |
| F | 6.77346211  | 1.39659862  | 0.41804741  |
| F | 7.21290059  | -0.80112334 | 0.70374188  |
| F | 5.75583900  | -0.13650119 | -0.89050475 |
| F | 7.99539808  | 0.27388859  | -1.16131638 |
